1 **Suppression of ERK signalling promotes pluripotent epiblast in the human**  
2 **blastocyst**

3

4 **Authors:** Claire S. Simon<sup>1,2</sup>, Afshan McCarthy<sup>2</sup>, Laura Woods<sup>1</sup>, Desislava Staneva<sup>1</sup>, Qiulin  
5 Huang<sup>1,2</sup>, Madeleine Linneberg-Agerholm<sup>3</sup>, Alex Faulkner<sup>4</sup>, Athanasios Papathanasiou<sup>5</sup>, Kay  
6 Elder<sup>5</sup>, Phil Snell<sup>5</sup>, Leila Christie<sup>5</sup>, Patricia Garcia<sup>6</sup>, Valerie Shaikly<sup>6</sup>, Mohamed Taranissi<sup>6</sup>,  
7 Meenakshi Choudhary<sup>4</sup>, Mary Herbert<sup>4</sup>, Joshua M. Brickman<sup>3</sup>, Kathy K. Niakan<sup>1,2,7,8\*</sup>

8 **Affiliations:**

9 <sup>1</sup>The Centre for Trophoblast Research, Department of Physiology, Development and  
10 Neuroscience, University of Cambridge, Cambridge CB2 3EG, UK

11 <sup>2</sup>Human Embryo and Stem Cell Laboratory, The Francis Crick Institute, 1 Midland Road,  
12 London NW1 1AT, UK

13 <sup>3</sup>Novo Nordisk Foundation Center for Stem Cell Biology, University of Copenhagen,  
14 Copenhagen, Denmark

15 <sup>4</sup>Newcastle Fertility Centre, Biosciences Institute, Newcastle University Centre for Life,  
16 Newcastle upon Tyne, UK

17 <sup>5</sup>Bourn Hall Clinic, Bourn, Cambridge, CB23 2TN, UK

18 <sup>6</sup>Assisted Reproduction and Gynaecology Centre, London, W1G 6LP, UK

19 <sup>7</sup>Wellcome Trust – Medical Research Council Stem Cell Institute, University of Cambridge,  
20 Jeffrey Cheah Biomedical Centre, Puddicombe Way, Cambridge CB2 0AW, UK

21 <sup>8</sup>Epigenetics Programme, Babraham Institute, Cambridge CB22 3AT, UK

22

23

24 \*Corresponding author. Email: [kkn21@cam.ac.uk](mailto:kkn21@cam.ac.uk)

1 **Abstract**

2 Studies in the mouse demonstrate the importance of fibroblast growth factor (FGF) and extra-  
3 cellular receptor tyrosine kinase (ERK) in specification of embryo-fated epiblast and yolk-sac-  
4 fated hypoblast cells from uncommitted inner cell mass (ICM) cells prior to implantation.  
5 Molecular mechanisms regulating specification of early lineages in human development are  
6 comparatively unclear. Here we show that exogenous FGF stimulation leads to expanded  
7 hypoblast molecular marker expression, at the expense of the epiblast. Conversely, we show  
8 that specifically inhibiting ERK activity leads to expansion of epiblast cells functionally  
9 capable of giving rise to naïve human pluripotent stem cells. Single-cell transcriptomic analysis  
10 indicates that these epiblast cells downregulate FGF signalling and upregulate molecular  
11 markers associated with naïve pluripotency. Our functional study demonstrates for the first  
12 time the molecular mechanisms governing ICM specification in human development, whereby  
13 segregation of the epiblast and hypoblast lineages occurs during maturation of the mammalian  
14 embryo in an ERK signal-dependent manner.

## 1 Introduction

2 Formation of the blastocyst is a critical event in embryogenesis occurring in the first  
3 week of human development. Two sequential cell fate decisions segregate the embryonic  
4 pluripotent epiblast from the extra-embryonic tissues, trophectoderm and hypoblast. Errors in  
5 cell differentiation can cause embryo arrest, leading to miscarriage. More than half of all  
6 natural conceptions are estimated to end in very early (<5 week) pregnancy loss<sup>1</sup>. Despite the  
7 significance for human health and stem cell biology, we do not understand the mechanisms  
8 which direct cell differentiation in the early human embryo. To improve our understanding of  
9 the mechanisms of cell fate specification in the early embryo, we studied the effects of cell-  
10 cell communication during this critical window of development.

11 The ability of FGFs to bias ICM cells towards hypoblast is conserved amongst  
12 mammals, including in rodents, rabbits, bovine and pig<sup>2-5</sup>. The molecular pathway governing  
13 ICM cell fate segregation has been elucidated genetically in the mouse. Within mouse ICM  
14 cells, and later in epiblast cells, the pluripotency marker NANOG induces *Fgf4* expression<sup>6</sup>.  
15 FGF4 ligand then signals in an autocrine manner to uncommitted ICM progenitors  
16 predominantly via FGFR1, then later by FGFR2 in hypoblast precursors<sup>7,8</sup>. Signalling  
17 activation then specifies hypoblast via a GRB2/MEK/ERK cascade leading to an upregulation  
18 of hypoblast specific markers such as *Gata6*, and a downregulation of epiblast markers like  
19 *Nanog*<sup>7-11</sup>. These molecular insights have also informed strategies to establish naïve mouse  
20 pluripotent stem cells *in vitro* that more closely resemble the blastocysts stage epiblast *in vivo*  
21 from which they were derived<sup>12,13</sup>. However, in human embryos, previous studies suggested  
22 that upstream FGF receptor (FGFR) or mitogen-activated protein kinase (MEK) inhibition did  
23 not affect hypoblast formation<sup>3,14</sup>.

24 We recently demonstrated crosstalk of FGF-driven mitogen-activated protein kinase  
25 (MEK) and insulin growth factor-driven phosphoinositol-3 kinase (PI3K) activity upstream of  
26 ERK signalling in human pluripotent stem cells (hPSCs) derived from the epiblast<sup>15</sup>. In  
27 addition, we showed that hypoblast differentiation *in vitro* from naïve hPSCs depends on FGF  
28 signalling and that naïve hPSCs can be maintained by simultaneously blocking the FGF  
29 receptor and its downstream kinase MEK<sup>16</sup>. We hypothesized that ERK may have a conserved  
30 role in human embryo hypoblast versus epiblast specification.

31 Here, we determined that exogenous FGF signalling activity is sufficient to specify the  
32 hypoblast in human blastocysts. We describe ERK signalling during the blastocyst stage and  
33 demonstrate that blocking ERK activity leads to expansion of epiblast cells functionally  
34 capable of giving rise to naïve hPSCs. Transcriptomic analysis further reveals that these

1 epiblast cells downregulate FGF signalling, while maintaining molecular markers of the  
2 epiblast. Our functional studies provide mechanistic insight into human blastocyst formation  
3 and reveal for the first time the molecular mechanisms that regulate ICM specification in  
4 humans. We propose a unified model in which segregation of the epiblast and hypoblast  
5 lineages occurs during maturation of the mammalian blastocyst in an ERK signal-dependent  
6 manner.

7

## 8 **Results**

### 9 **Exogenous FGF is sufficient to drive human hypoblast specification**

10 We hypothesized that FGF4 may play a conserved role in human preimplantation  
11 development. Transcriptional analysis of human pre-implantation embryos<sup>17-19</sup> indicates that  
12 there is pan-ICM expression of the FGFR1 receptor, while FGF4 is expressed specifically in  
13 epiblast cells (Supplementary Fig. 1a), consistent with current mouse models of ICM  
14 segregation where FGF4 acts predominantly via FGFR1 upstream of pERK in uncommitted  
15 ICM cells to specify hypoblast<sup>7,8</sup>.

16 To test the effect of exogenous FGF signalling on human embryos we carried out a  
17 dose-response experiment. We treated Day 5 human embryos and cultured them for 36h in  
18 medium containing 0ng/ml, 250ng/ml, 500ng/ml, 750ng/ml and 1000ng/ml FGF4 plus Heparin  
19 (which stabilizes FGF interactions) (Fig. 1a). Immunofluorescence analysis of NANOG  
20 (epiblast), GATA4 (hypoblast) and GATA3 (trophectoderm, placental progenitor cells)  
21 showed that increasing concentrations of FGF4 increased the number of hypoblast cells (Figs.  
22 1a,1b and Supplementary Fig. 1b). The mean number of hypoblast cells in 750ng/ml FGF4  
23 treated embryos increased by 2-fold, when compared to control embryos ( $p = 0.04$ , mean 16  
24 vs 8 hypoblast cells per embryo) (Fig. 1b). While there was a 2-fold reduction in the mean  
25 number of epiblast cells when comparing 750ng/ml FGF4 treated embryos with controls, this  
26 difference was not significant (Fig. 1c,  $p = 0.07$ , mean 3 vs 7 epiblast cells per embryo).  
27 Increasing concentrations of FGF4 had no significant effect on ICM cell number  
28 (Supplementary Fig. 1c). Consistent with changes in both epiblast and hypoblast numbers, we  
29 found that increasing concentration of FGF4 increased the ratio of hypoblast : epiblast cells in  
30 the ICM (Fig. 1d, Control 46% hypoblast, 750ng/ml 84% hypoblast  $p=0.0004$  and 1000ng/ml  
31 84% hypoblast  $p=0.01$ ), and embryos exhibited an all-hypoblast ICM in a dose-dependent  
32 manner (Supplementary Fig. 1d).

33 This is consistent with the response in mouse and cow embryos to similar doses of  
34 FGF4, where NANOG or SOX2 (epiblast) expression is downregulated and the ICM is

1 predominantly comprised of SOX17- or GATA6-expressing hypoblast cells (Supplementary  
2 Fig. 1e, 1f), similar to previous studies<sup>2,3</sup>. Moreover, we determined that rat preimplantation  
3 embryos also responded to FGF4, downregulating NANOG and upregulating GATA6  
4 expression throughout the ICM (Supplementary Fig. 1g). Overall, our findings demonstrate  
5 that FGF4 is sufficient to drive human hypoblast specification, a mechanism conserved across  
6 species.

## 8 **Suppression of ERK signalling blocks hypoblast formation in the human blastocyst**

9 FGFs can activate multiple downstream pathways, including ERK, PKC and PI3K<sup>20</sup>.  
10 Our previous work identified active phosphorylated ERK (pERK) in human whole blastocyst  
11 protein lysates<sup>15</sup>. However, we had not defined the cell type that contains this signalling  
12 activity. To address this question, we analyzed pERK by immunofluorescence staining<sup>21</sup>,  
13 beginning with mouse embryos to establish a positive control. Consistent with previous  
14 studies<sup>21,22</sup>, pERK protein expression is detectable in the ICM (Supplementary Fig. 2a). We  
15 next characterized pERK expression by immunofluorescence analysis in primed human  
16 embryonic stem cells (hESCs) and detected pERK cytoplasmic localization. As expected,  
17 MEK inhibition using PD0325901 led to downregulation of pERK in hESCs, indicating  
18 specificity of the immunofluorescence analysis (Supplementary Fig. 2b). Next, we stained for  
19 pERK in human blastocysts from Days 5 to 6.5, using SOX2 and OTX2 as markers of the  
20 epiblast and hypoblast, respectively (Fig. 2a). Active pERK is evident in the cytoplasm of  
21 epiblast, hypoblast and trophectoderm cell types, with a high proportion of hypoblast having  
22 ERK<sup>high</sup> cells (Fig. 2b). The level of pERK in embryos increases over time (Fig. 2c), altogether  
23 suggesting a role for this signalling pathway in early human development.

24 To determine if ERK is the effector of ICM specification, we used Ulixertinib<sup>23</sup>, a  
25 selective ATP-competitive inhibitor of ERK1/2. As expected, Ulixertinib treatment (ERK  
26 inhibition treatment, referred to as ERKi) led to downregulation of GATA4 hypoblast in the  
27 mouse and an ICM exclusively comprised of NANOG expressing epiblast cells  
28 (Supplementary Data Fig 2c), consistent with previous studies<sup>24</sup>. In addition, the ICM of cow  
29 embryos following ERKi lost SOX2-GATA6<sup>+</sup> hypoblast cells (Supplementary Fig. 2d).

30 We then cultured Day 5 human embryos for 36h in medium containing volume matched  
31 DMSO (Control) or 5 $\mu$ M Ulixertinib (ERKi) (Fig. 2d) followed by quantitative  
32 immunofluorescence staining (Supplementary Fig. 2e). Blocking ERK signalling resulted in  
33 embryos with no GATA4 expression, and an ICM comprising of predominantly NANOG

1 positive cells (Figs. 2d, 2e, 2f). ERKi treatment thus led to a loss of hypoblast in the majority  
2 of treated embryos (Fig. 2e,  $p = 0.003$ , 2 vs 13 hypoblast cells per embryo). Additionally, there  
3 was a modest increase in the number of epiblast cells in ERKi embryos compared with controls  
4 (Fig. 2f,  $p = 0.4$ , 15 vs 12 epiblast cells per embryo). The proportion of hypoblast : epiblast  
5 cells was dramatically distorted in ERKi treated embryos as there were no significant changes  
6 in ICM cell numbers (Fig. 2g, Supplementary Fig. 2f, 2g, control 52% hypoblast, and ERKi  
7 9% hypoblast,  $p = 0.0002$ ). The majority of ERKi embryos demonstrated an all-epiblast ICM  
8 phenotype (Supplementary Fig. 2g), while those that retained some hypoblast cells also had a  
9 greater cell number indicating a more advanced developmental age, and suggesting this  
10 residual hypoblast could be a result of lineage specification that occurred prior to exposure to  
11 ERKi.

12 We also observed a similar phenotype when culturing embryos for a shorter window of  
13 24 hours, from Day 5 in ERKi. Here, ERKi embryos lost the early hypoblast marker GATA6  
14 and retained high levels of pluripotency epiblast markers NANOG and OCT4 (Supplementary  
15 Fig. 2h). Thus, human ICM specification to epiblast and hypoblast likely occurs between the  
16 early- (Day 5) to mid- (Day 6) blastocyst stages. Together, these results show ERK signalling  
17 is active at the time of ICM segregation in human blastocysts, and suppression of this pathway  
18 blocks hypoblast formation.

19

## 20 **ERKi of human embryos leads to upregulation of transcripts associated with naïve** 21 **pluripotency**

22 To characterize the impact of ERK signalling inhibition on epiblast versus hypoblast  
23 lineage segregation, we performed single-cell RNA-seq analysis on ERKi treated human  
24 embryos compared to DMSO treated controls. We integrated this dataset with reference  
25 untreated control blastocyst datasets at embryonic days 6 and 7<sup>17-19</sup>, which are equivalent  
26 stages of development to the treatment conditions.

27 To investigate transcriptional differences between the reference and control versus  
28 ERKi-treated cells, we focused on cluster 2, which is enriched for ICM cells that express  
29 epiblast and hypoblast molecular markers<sup>25</sup> (Figs. 3a, 3b, 3c, Supplementary Data 3a).  
30 Differential gene expression analysis of cells in ICM cluster 2 indicated that ligands and  
31 receptors of the FGF and downstream ERK signalling pathway (e.g. *FGF4*, *GRB2*, *FGFR3*,  
32 *FGF23*), ERK-induced signal regulated ETS transcription factors (*ERF*, *ETV1*, *ETV4*, *ETV5*,  
33 *ETV6*), and downstream regulators (e.g. *DUSP6*, *DUSP7*, *DUSP8*, *DUSP9*, *DUSP14*, *SPRY4*)

1 were transcriptionally affected following ERKi (Fig. 3d, Supplementary Table 1). Moreover,  
2 ERKi-treated ICM cells downregulated *GATA6*, *GATA4*, *PDGFRA*, *HNF4A*, *SOX17*, *DAB2*,  
3 *COL4A1*, and immediate early FGF responses genes, such as *DUSP6*, indicating that both  
4 signalling and hypoblast-enriched transcripts were perturbed (Fig. 3d, Supplementary Table  
5 1). By contrast, transcripts associated with the pluripotent epiblast or naïve pluripotency such  
6 as *DNMT3L*, *DNMT3A*, *DPPA5*, *KLF17*, *KLF3*, *KLF5*, *NODAL*, *POU5F1*, *PRDM1*, *PRDM14*  
7 and *SOX2*, were significantly upregulated in ICM cells following ERKi-treatment compared to  
8 controls (Fig. 3d, Supplementary Table 1).

9 We confirmed at the protein level that the pluripotent epiblast markers *SOX2* and  
10 *KLF17* are expressed throughout the ICM and that the early hypoblast marker *PDGFRA* is  
11 downregulated following ERKi- treatment (Fig. 3e, Supplementary Fig. 3b). This is consistent  
12 with our previous results where *NANOG* and *OCT4* pluripotency markers are similarly  
13 retained throughout the ICM in ERKi-treated embryos (Fig. 2d, Supplementary Fig. 2h).

14 To investigate transcriptional differences specifically between the ERKi-treated versus  
15 control epiblast cells within the ICM, we transcriptionally compared the cells we sequenced in  
16 this study to a recently curated high-confidence set of epiblast, hypoblast and trophoctoderm  
17 cells<sup>26</sup> (Supplementary Fig. 3c, Supplementary Table 2). This indicated that ERKi and DMSO  
18 treated cells were transcriptionally similar to either epiblast or trophoctoderm and that we did  
19 not collect any hypoblast cells in either treatment condition (Supplementary Fig. 3c).  
20 Differential gene expression analysis comparing epiblast reference and control versus ERKi-  
21 treated epiblast-like cells confirmed that components of the FGF/ERK signalling pathway were  
22 significantly disrupted. This included downregulation of FGF ligands (*FGF5* and *FGF23*), the  
23 downstream MAP kinase *MAPKAPK3*, negative feedback regulators (*DUSP6* and *DUSP18*),  
24 and transcriptional effector ETS-family member, *ETV5* (Fig. 3f, Supplementary Fig. 3d,  
25 Supplementary Table 2). Pathway enrichment analysis further shows a significant effect on  
26 genes associated with signal transduction, including inactivation of MAPK activity (Fig. 3g).  
27 Notably, genes associated with Insulin/PI3K signalling were also both transcriptionally up and  
28 downregulated (e.g. *INSR*, *IGF2*, *IGFBP2*, *MAP4K4*, *MAPK9* and *FOS*) (Fig. 3f,  
29 Supplementary Fig. 3d, Supplementary Table 2).

30 We noted that while molecular markers associated with naïve pluripotency were  
31 upregulated, markers of formative/primed pluripotency such as *ETV5*, *FGF5* and *WNT7B* were  
32 significantly downregulated in ERKi-treated cells compared to controls (Supplementary Fig.  
33 3d, Supplementary Table 2). We speculate that abolishing FGF/ERK activity may lead to a

1 more immature epiblast state in ERKi cells, similar to observations in mouse<sup>7,8,12</sup>. We therefore  
2 integrated single cell datasets from embryonic days 4 and 5 of development, representing the  
3 morula and early blastocyst stages of development, respectively (Fig. 3h). Principal component  
4 analysis indicated that 9 out of the 14 ERKi treated epiblast cells were transcriptionally more  
5 similar to early blastocyst cells at embryonic day 5 (Fig. 3h, Supplementary Fig. 3e, 3f).  
6 Altogether this indicates that ERKi treatment leads to transcriptional downregulation of ERK  
7 signalling components and upregulated naïve pluripotency associated molecular markers.

8

### 9 **Suppression of ERK signalling promotes pluripotent epiblast identity**

10 To functionally test the pluripotent potential of the epiblast following ERKi treatment  
11 of embryos, we aimed to derive naïve hESC lines. Previously, naïve hESCs, the *in vitro* stem  
12 cell counterpart of the pre-implantation epiblast, were derived directly from isolated ICM cells  
13 in conditions containing a titrated concentration of GSK3, MEK and PKC inhibitors together  
14 with LIF (t2iLGö) medium<sup>27–29</sup>. We initially tested to see if we could directly derive naïve  
15 hESCs from human blastocysts in the further optimized medium where the GSK3 inhibitor has  
16 been replaced with XAV939, a tankyrase inhibitor and Wnt pathway antagonist (PXGL)<sup>30</sup>. We  
17 plated Day 6 human blastocysts, intact or following mural trophectoderm laser dissection. We  
18 were able to derive 5 stable naïve hESC cell lines from 8 blastocysts in both intact and dissected  
19 conditions (Supplementary Data Figs. 4a-c), demonstrating efficient naïve hESC derivation in  
20 PXGL medium.

21 After 36h in either ERKi or DMSO culture, we plated whole intact blastocysts in naïve  
22 PXGL medium to derive naïve hESCs (Supplementary Fig. 4d). After ICM outgrowth and  
23 passaging, we were able to establish 2/8 naïve hESC lines from control embryos and 5/9 naïve  
24 hESC lines from the ERKi treated embryos (Fig. 4a). These lines had characteristic compact  
25 and domed naïve ESC morphology (Fig. 4b), and immunofluorescence analysis showed they  
26 expressed core pluripotency markers OCT4 and SOX2, and naïve pluripotency markers KLF4,  
27 KLF17, SUSD2, and TFAP2C<sup>31–34</sup> (Figs. 4c, 4d).

28 The hESCs derived in PXGL media following either ERKi or DMSO treatment were  
29 transcriptionally more similar to previously established naïve hPSCs than primed hPSCs (Fig.  
30 4e). Moreover, the PXGL hPSCs were similar to previously derived naïve hPSCs in their high  
31 expression of naïve markers *KLF4*, *KLF17*, *DNMT3L*, and *DPPA3*, low expression of primed  
32 markers *ETV4*, *ETV5* and *SALL2* and equivalent level of general pluripotency markers  
33 *POU5F1*, *NANOG* and *SOX2* compared to primed hPSCs (Fig. 4f). PXGL hPSCs derived



1 following ERKi or DMSO treatment also resembled previously established naïve hESCs in  
2 transcriptional similarity to human blastocyst epiblast cells compared to primed hPSCs (Fig.  
3 4g). Furthermore, the newly established PXGL hPSCs cell lines were karyotypically normal  
4 (Supplementary Fig. 4e).

5 We next sought to determine if the MEK inhibitor PD0325901 (“P” in PXGL media)  
6 in naïve pluripotent stem cell derivation and maintenance could be replaced with our ERKi  
7 Ulixertinib (“U” in UXGL media). Following 36h of either ERKi or DMSO treatment we  
8 plated the laser dissected ICM of blastocysts in UXGL media (Supplementary Fig. 4f).  
9 Following ICM outgrowth and subsequent passaging, we were able to establish 1/4 naïve hESC  
10 from control embryos and 2/4 naïve hESC lines from ERKi treated embryos (Supplementary  
11 Fig. 4g). As above, the UXGL hESC lines had characteristic domed shaped morphology and  
12 expressed expressed SOX2, NANOG and OCT4 in addition to naïve pluripotency markers  
13 KLF4, KLF5, KLF17, TFAP2C and DNMT3L (Supplementary Data Figs. 4h, 4i). In  
14 conclusion, ERKi embryos retain pluripotency markers throughout their ICM and give rise to  
15 ground-state pluripotent stem cells, demonstrating their naïve potential.

16

## 17 **Discussion**

18 Our data demonstrates that FGF4 is sufficient to drive human hypoblast specification  
19 in a dose dependent manner. Divergence of epiblast and hypoblast markers between FGF4  
20 expressing and non-expressing cells in the human ICM further supports FGF/ERK governing  
21 lineage segregation<sup>35</sup>. However, it is still an outstanding question which ligands drive this  
22 signalling activity *in vivo*. Further work is needed *in vivo* to confirm endogenous human FGF4  
23 function in hypoblast specification, and whether other RTKs such as IGFs<sup>15</sup>, or parallel  
24 pathways such as WNTs as has been suggest in marmoset monkeys<sup>14</sup>, may additionally be  
25 involved.

26 The necessity for FGF/ERK in human hypoblast specification has also been suggested  
27 by stem cell models, where conversion of naïve ESC to hypoblast-like naïve endoderm (nEnd)  
28 is prevented by FGFR inhibition<sup>16</sup>. However, attempts at blocking the FGF/MEK/ERK  
29 pathway using small molecule inhibitors against MEK or FGFR produced varying outcomes  
30 in mammalian embryos, and might argue for intrinsic species-specific differences in the  
31 molecular mechanism of ICM cell fate decisions. For example, while mouse, rat and rabbit  
32 embryos all lost hypoblast cells upon MEKi, only mouse and rat have an accompanying  
33 expansion of epiblast cells<sup>2,5,14</sup>. By contrast, in pig, cow, and marmoset embryos MEKi did not

1 completely block hypoblast specification, but the numbers of cells were reduced<sup>3,4,36</sup>. Most  
2 surprisingly, in human embryos, MEKi and/or FGFRi did not affect hypoblast formation in a  
3 significant manner<sup>3,14</sup>. One possibility for the discrepancy is that the concentrations of the  
4 FGFR- or MEK-inhibitors used, ratio of media to mineral oil or diffusion across the zona may  
5 all impact on efficacy of the treatment and were therefore insufficient to fully inhibit ERK  
6 activity<sup>37</sup>. Moreover, we speculate that there may be compensation or crosstalk from other  
7 pathways<sup>15</sup> whereby FGFR or MEK inhibition may not have completely abolished ERK  
8 activity. A recent study using human stem cell-based embryo models, and exogenous FGF2 or  
9 FGFR inhibition treatment of human embryos, corroborates the findings we present here,  
10 suggesting a role for FGF in hypoblast specification<sup>38</sup>.

11 We find that inhibiting ERK signalling leads not only to expansion of epiblast marker  
12 expression, but also upregulation of genes associated with naïve pluripotency competent for  
13 naïve hESCs derivation. Moreover, we replaced the requirement for MEKi with an ERKi,  
14 thereby establishing an alternative method for naïve hPSC derivation. It will be interesting to  
15 determine in the future if these cells are an improvement over previously established naïve  
16 hPSCs in terms of karyotypic stability, capacitation, directed differentiation or epigenetic  
17 characteristics such as genomic imprinting.

18 Our comparison across mouse, rat, cow and human embryos demonstrates a conserved  
19 mechanism regulating the second cell fate specification decision shortly after fertilization. Our  
20 data further supports step-wise specification of three lineages in human preimplantation  
21 development. This is consistent with our functional data revealing the importance of cell  
22 polarity and Hippo signalling activity in regulating ICM versus trophectoderm cell fate  
23 specification<sup>39,40</sup>. Our data is also consistent with recent re-analysis of single-cell RNA-seq  
24 data together with protein analysis characterizing ICM progenitor cells, suggesting a step wise  
25 progression of TE versus ICM specification followed by segregation of the ICM to epiblast  
26 and hypoblast cells<sup>41,42</sup>. Altogether we show that ERK activity can alter the balance between  
27 EPI and hypoblast, suggesting a cell fate switch of a common ICM progenitor. These insights  
28 inform our understanding of human development and stem cell biology.

Figure 1

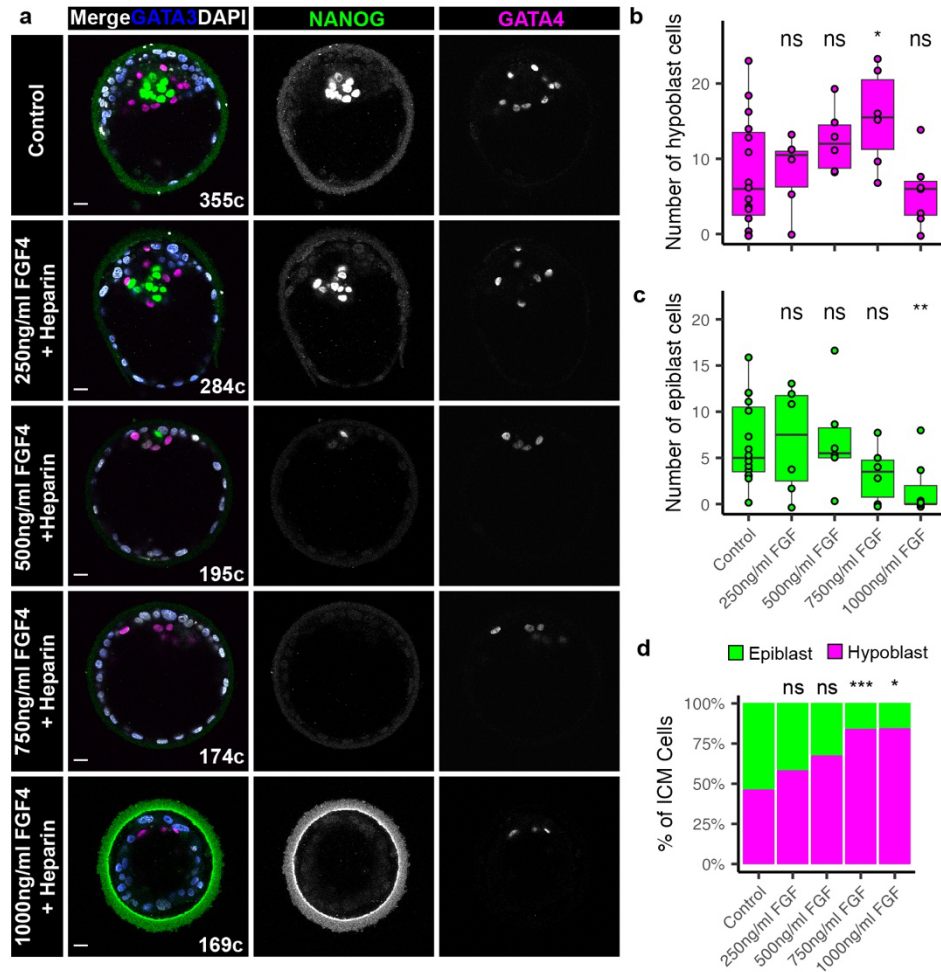

1  
2 **Fig. 1. Exogenous FGF is sufficient for driving human hypoblast specification. (a)**  
3 Confocal images of Day 6.5 human embryos immunofluorescently labelled for lineage markers  
4 NANOG (epiblast), GATA4 (hypoblast) and GATA3 (trophectoderm), and stained for nuclear  
5 DAPI. Human embryos were cultured in Control medium, or medium supplemented with  
6 increasing concentrations of FGF and Heparin as indicated from Day 5 for 36 hours. Total cell  
7 number (c) indicated. Scale bars 20 μm. (b - c) Boxplots showing the number of (b) hypoblast  
8 (GATA4+NANOG-GATA3-) and (c) epiblast (NANOG+GATA4-GATA3-) cells in human  
9 embryos cultured in increasing concentrations of FGF and Heparin. Values for each embryo  
10 are shown as individual points. Control n = 15, 250ng/ml n = 7, 500ng/ml n = 6, 750ng/ml n=6,  
11 1000ng/ml n=7. (d) Stacked bar charts showing the mean proportion of epiblast and hypoblast  
12 in the ICMs per embryo in each treatment group. Embryos without ICMs were excluded from  
13 the analysis. Control n = 14, 250ng/ml n = 5, 500ng/ml n = 6, 750ng/ml n=6, 1000ng/ml n=6.  
14 Two-tailed t-test, n.s. not significant \* p < 0.05, \*\* p < 0.01, \*\*\* p < 0.001.

15

Figure 2

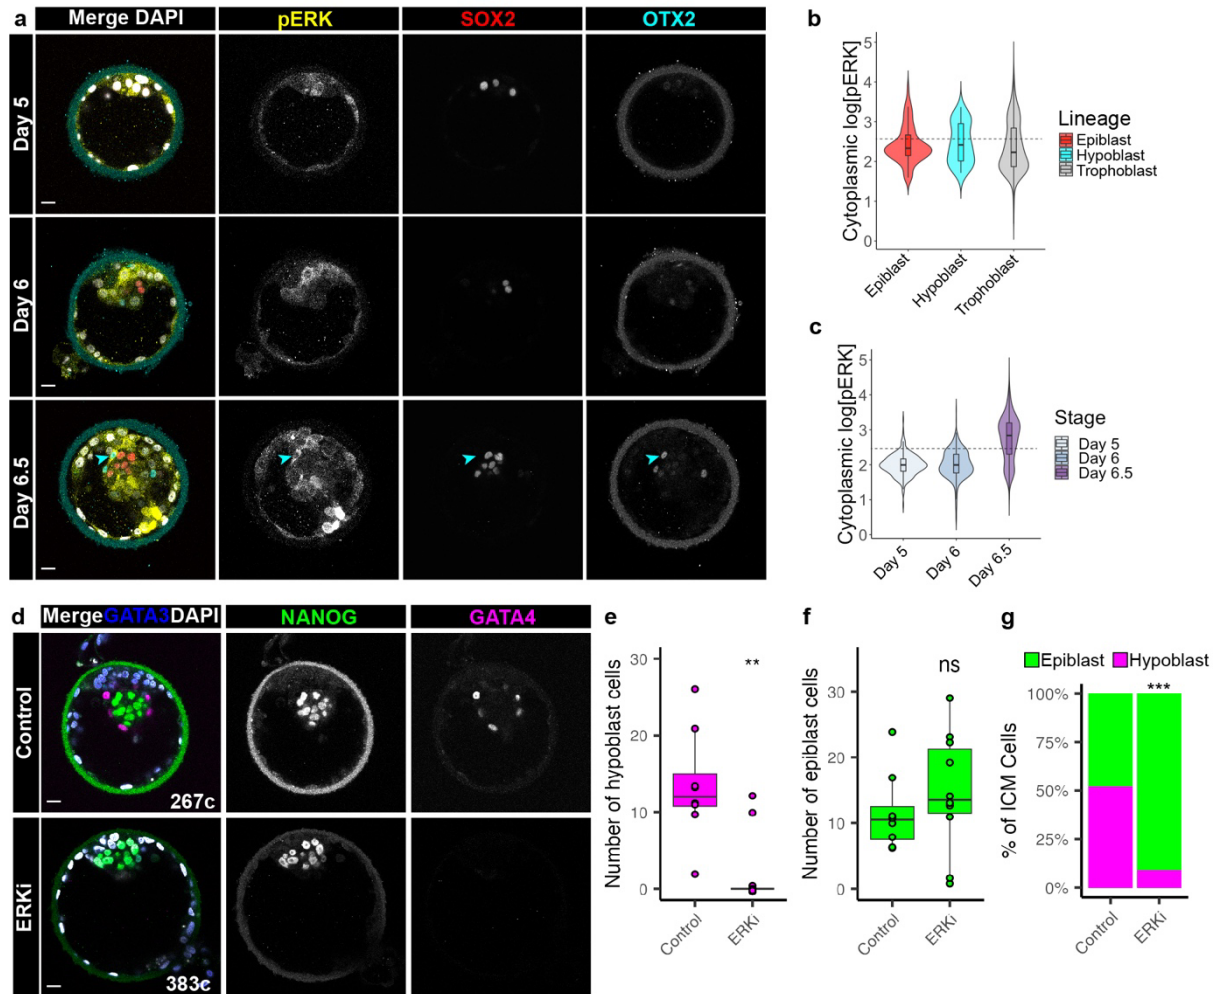

1  
2 **Fig. 2. Suppression of ERK signalling blocks hypoblast formation in the human**  
3 **blastocyst. (a)** Confocal images of Day 5 - 6.5 human embryos immunofluorescently labelled  
4 for phosphorylated (p)-ERK, lineage markers SOX2 (epiblast), OTX2 (hypoblast), and stained  
5 for nuclear DAPI. Cyan arrow indicates a hypoblast cell with high pERK levels. Scale bars 20  
6  $\mu\text{m}$ . **(b)** Violin plots showing the cytoplasmic fluorescence intensity of pERK in each lineage  
7 in embryos shown in (a). Epiblast n = 83 cells, hypoblast n = 41 cells, trophectoderm n = 1535  
8 cells; n = 10 embryos. Dashed line indicates threshold between ERK<sup>low</sup> and ERK<sup>high</sup> cells. **(c)**  
9 Violin plots showing the cytoplasmic fluorescence intensity of pERK over time in embryos  
10 shown in (a). Day 5 n = 313 cells; 3 embryos, Day 6 n = 542 cells; 3 embryos, Day 6.5 n = 804  
11 cells; 4 embryos. Dashed line indicates threshold between ERK<sup>low</sup> and ERK<sup>high</sup> cells. **(d)**  
12 Confocal images of Day 6.5 human embryos immunofluorescently labelled for lineage markers  
13 NANOG (epiblast), GATA4 (hypoblast) and GATA3 (trophectoderm) and stained for nuclear  
14 DAPI. Human embryos cultured with or without ERKi (5 $\mu\text{m}$  Ulixertinib) from Day 5 for 36  
15 hours. Total cell number (c) indicated. Scale bars 20  $\mu\text{m}$ . **(e-f)** Boxplots showing the number  
16 of (e) hypoblast (GATA4<sup>+</sup>) and (f) epiblast (NANOG<sup>+</sup>) cells in human embryos cultured

1 with and without ERKi. Values for each embryo are shown as individual points. **(g)** Stacked  
2 bar charts showing the mean proportion of epiblast and hypoblast in the ICMs per embryos in  
3 each treatment group. Control n = 8, ERKi n = 10. Two-tailed t-test, ns= not significant, \* p <  
4 0.05, \*\* p < 0.01, \*\*\* p < 0.001  
5

Figure 3

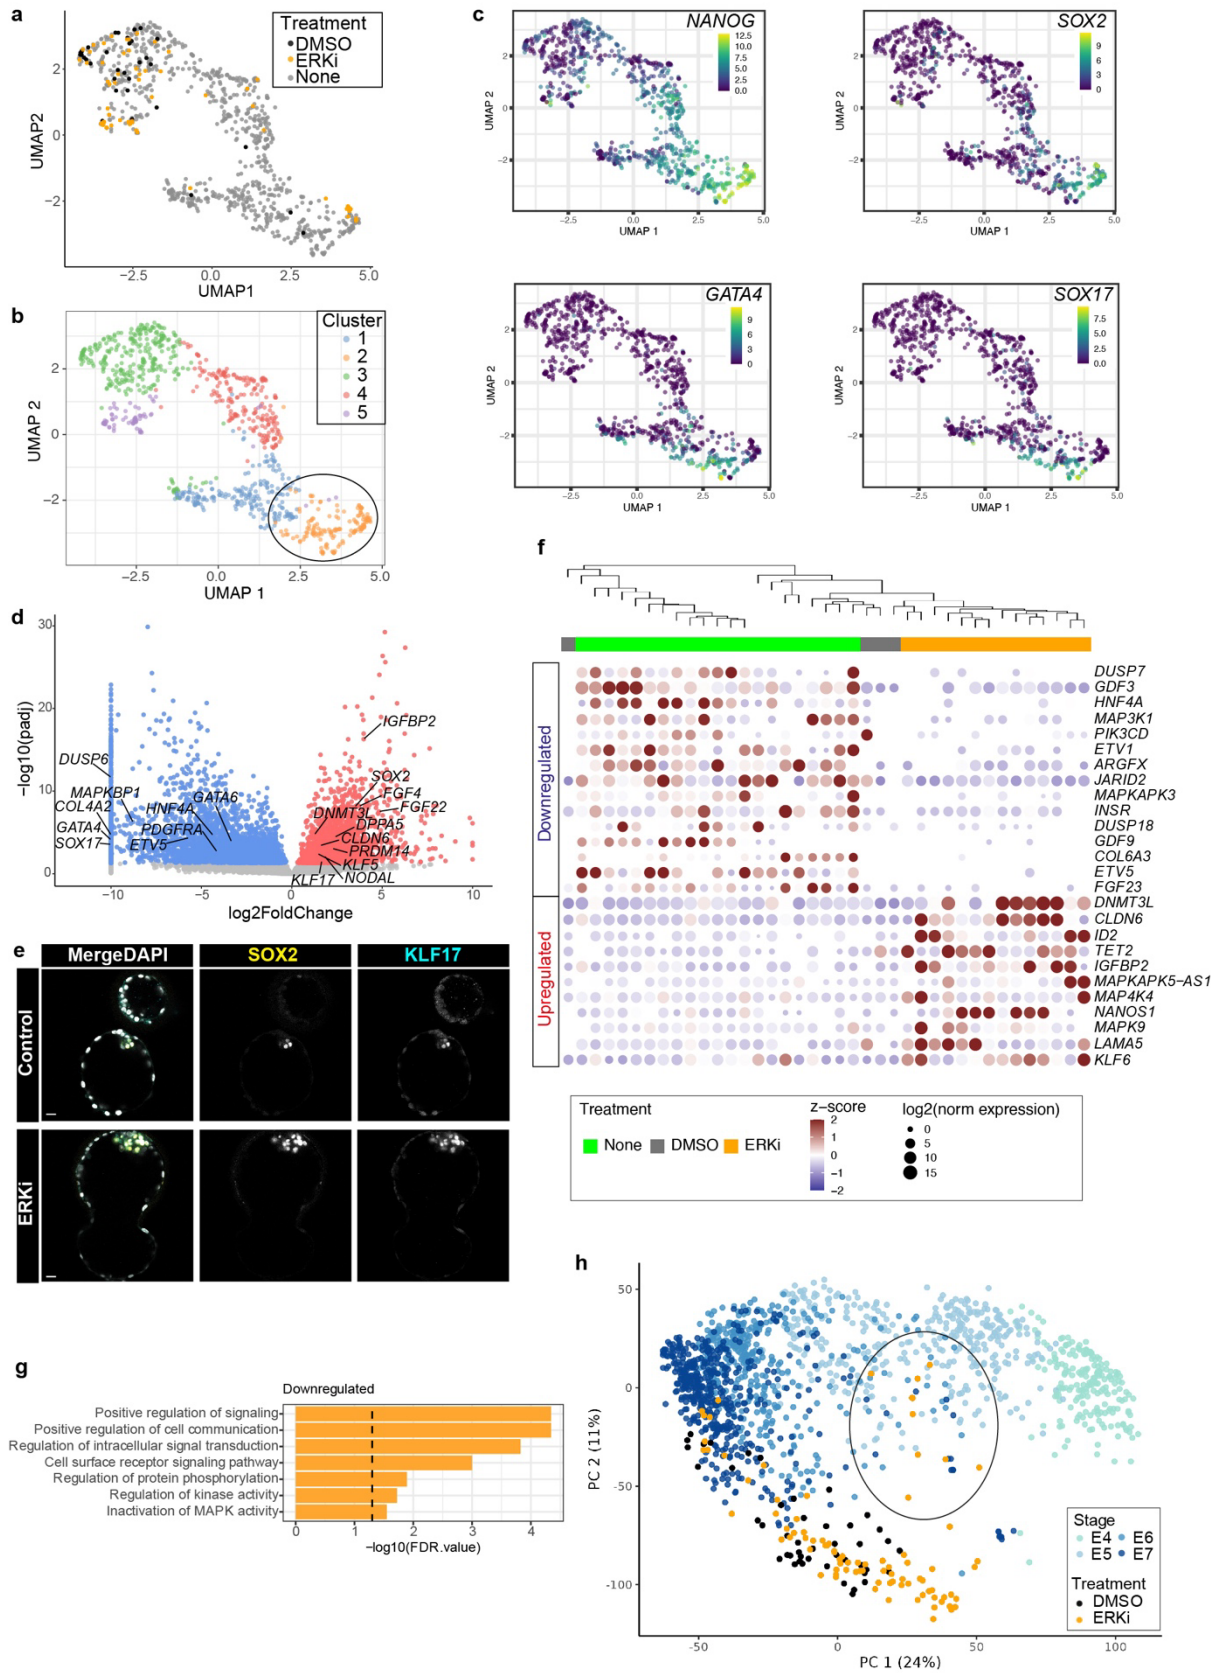

1

2 **Fig. 3. ERKi of human embryos leads to upregulation of transcripts associated with naïve**  
 3 **pluripotency (a) UMAP of embryonic cells at days 6 - 7, calculated based on lineage markers**  
 4 **from a previous publication<sup>25</sup>. No treatment reference control data<sup>17-19</sup> (grey), human embryos**

1 cultured in ERKi (orange) or volume-matched DMSO (black). **(b)** UMAP coloured according  
2 to cluster identity. **(c)** UMAP coloured by expression of epiblast or hypoblast marker genes  
3 from previous publication<sup>25</sup>. Scales show log transformed normalised expression values. **(d)**  
4 Volcano plot with genes significantly differentially expressed (DESeq2 padj < 0.05) between  
5 ERKi treated and control (DMSO and untreated) cells from the ICM cluster 2 in panel A.  
6 Representative genes upregulated (red) or downregulated (blue) DESeq2 padj < 0.05 in ERKi  
7 compared to control (DMSO and untreated) cells are highlighted. X axis shows the mean log2  
8 fold change (ERKi – control) with large values capped at 10. **(e)** Confocal images of Day 6.5  
9 human embryos immunofluorescently labelled for SOX2 and KLF17 (epiblast) and stained for  
10 nuclear DAPI. Scale bars 20  $\mu$ m. **(f)** Hierarchical clustering of DMSO and ERKi treated cells  
11 and selected high-confidence epiblast control samples from previous publication<sup>26</sup>. Selected  
12 downregulated or upregulated genes (DESeq2 padj < 0.1) are shown and labeled as log2  
13 normalized and z-score expression values. **(g)** Representative gene set enrichment analysis of  
14 terms associated with genes that were significantly downregulated in ERKi versus control cells  
15 in the epiblast cluster. **(h)** Principal component analysis of single cells from embryonic days 4  
16 - 7 from previous studies<sup>17-19</sup> (shades of blue), DMSO treated controls (black) and ERKi-  
17 treated (orange). Principal components calculated based on the top 10% variable genes (n =  
18 957).  
19

Figure 4

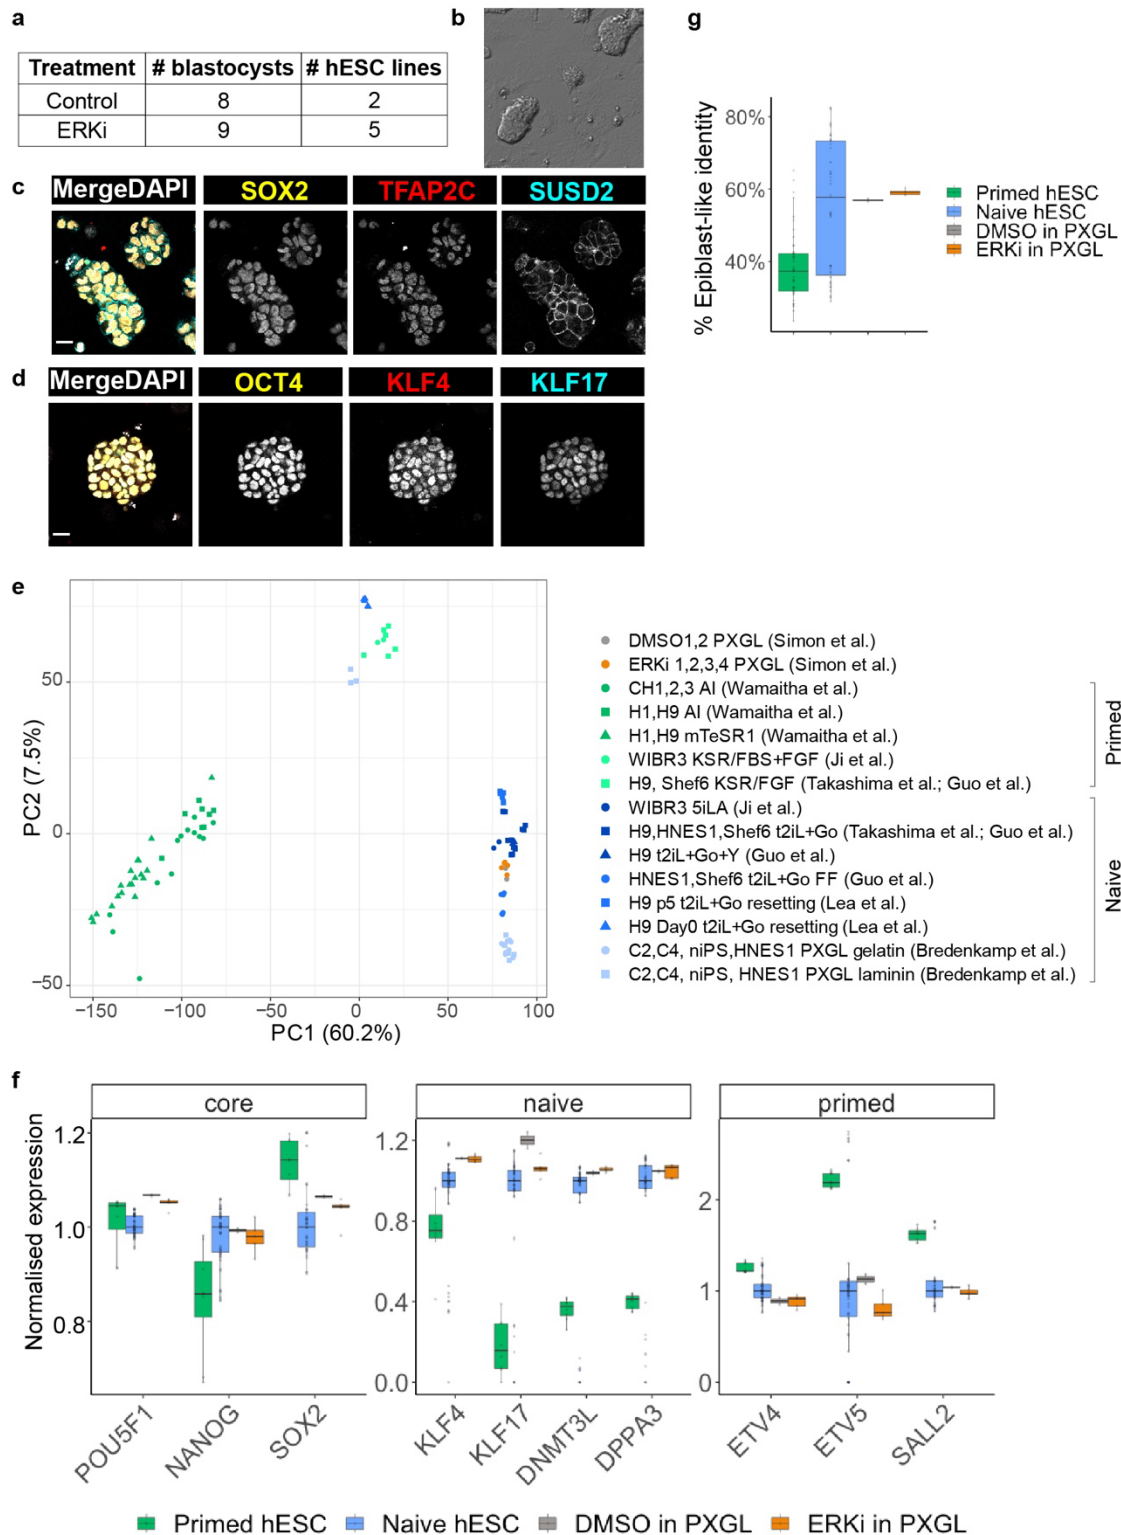

1  
2 **Fig. 4. Suppression of ERK signalling promotes pluripotent epiblast identity.** (a) Table  
3 showing outcome of naïve hESC derivation from Control and ERKi cultured embryos. (b)  
4 Phase-contrast image of a naïve hESC line derived from an ERKi embryo. (c-d) Confocal  
5 images of naïve hESC line derived from an ERKi embryo, immunofluorescently labelled for  
6 naïve (TFAP2C, SUSD2, KLF4, KLF17) and core (SOX2, OCT4) pluripotency markers and



1 stained for nuclear DAPI. Scale bars 20 $\mu$ m. **(e)** Principal component analysis following RNA-  
2 seq of hESC. The reference cell lines used are noted in the legend compared to the PXGL hESC  
3 lines derived in this study. Per-gene variance was modeled, and significantly variable genes  
4 (DESeq2 padj < 0.05) were used in the loading. **(f)** Boxplot showing the normalized expression  
5 (Log2 of the DESeq2 normalized read counts) of selected pluripotency genes relative to median  
6 expression within published naïve PSCs. Previously published primed (n = 48) or naïve (n =  
7 55) hESCs or in the PXGL hESC lines (n = 2 of DMSO PXGL hESCs or n = 5 for ERKi  
8 PXGL) derived in this study. **(g)** Boxplot of genes enriched in epiblast cells were used as a  
9 comparison to previously published primed (n = 48) or naïve (n = 55) hESCs or PXGL hESC  
10 lines derived in this study following ERKi (n = 5) or DMSO (n = 2) treatment.

## 1 **Materials and Methods**

### 2 **Ethics statement**

3 This study was approved by the UK Human Fertilisation and Embryology Authority (HFEA):  
4 research licence numbers R0162, R0397, R0401 and R0152 and independently reviewed by  
5 the Health Research Authority's Research Ethics Committee IRAS projects 308099, 252286  
6 and 272218.

7 The process of licence approval entailed independent peer review along with consideration by  
8 the HFEA Licence and Executive Committees and the Research Ethics Committee. Our  
9 research is compliant with the HFEA Code of Practice and has undergone multiple inspections  
10 by the HFEA since the licence was granted.

11 Informed consent was obtained from all couples that donated spare embryos following  
12 infertility treatment. Before giving consent, people donating embryos were provided with all  
13 the necessary information about the research project, an opportunity to receive counselling and  
14 the conditions that apply within the licence and the HFEA Code of Practice. Donors were  
15 informed that embryos used in the experiments would be stopped before 14 days post-  
16 fertilization and that subsequent biochemical and genetic studies would be performed.  
17 Informed consent was also obtained from donors for all the results of these studies to be  
18 published in scientific journals. No financial inducements were offered for donation. Consent  
19 was obtained for creation and culture of embryonic stem cell lines from these embryos and  
20 deposition of cell lines in the UK Stem Cell Bank. Embryos surplus to the patient's IVF  
21 treatment were donated cryopreserved and were transferred to the University of Cambridge  
22 and Francis Crick Institute, where they were thawed and used in the research project.

23

### 24 **Human Embryo Thaw**

25 Human embryos were thawed using vit kit-Thaw (Fujifilm) for vitrified embryos, or  
26 BlastThaw™ Kit (CooperSurgical) for slow frozen embryos according to the manufacturer's  
27 instructions.

28

### 29 **Human Embryo Culture**

30 Human blastocysts were cultured in pre-equilibrated Global Media (Cooper Surgical)  
31 supplemented with 10% Human Serum Albumin (HSA, Cooper Surgical) in Embryo+ slide

1 dishes (Vitrolife) overlaid with mineral oil (Cooper Surgical) at a ratio of 1 media : 9 mineral  
2 oil. Embryos were alternatively cultured in GT-L culture media. Embryos were incubated at  
3 37°C 5.5% CO<sub>2</sub> in an EmbryoScope time-lapse imaging system (Vitrolife). For treatments,  
4 immediately after thawing embryos were incubated in Global media, 10% HSA supplemented  
5 with; 250 FGF: 250ng/ml FGF4 (R&D) and 250ng/ml Heparin (Sigma); 500 FGF: 500ng/ml  
6 FGF4 and 500ng/ml Heparin; 750 FGF: 750ng/ml FGF4 and 750ng/ml Heparin; 1000 FGF:  
7 1000ng/ml FGF4 and 1000ng/ml Heparin; 5µM Ulixertinib (Cambridge Bioscience); 1%  
8 DMSO. Day 5 embryos were treated with cytokines and inhibitors for either 36 or 24 hours.

9

## 10 **Human and Mouse Embryo Dissociation**

11 Human and mouse embryos were subject to immunosurgery to remove outer trophectoderm  
12 cells and isolate the inner cell mass (ICM), as reported previously<sup>27,43</sup>. The zona pellucida was  
13 removed by washing embryos through drops of Acidic Tyrode's solution (Merck) pre-warmed  
14 to 37°C and overlaid with mineral oil. Embryos were then washed briefly and incubated at  
15 37°C for 30 min in 20% anti-mouse serum antibody (Sigma) or 20% anti-human serum  
16 antibody (Sigma), depending on the species, in Global media + 10% HSA. Embryos were then  
17 washed briefly in Global Media + 10% HSA, before incubation with 20% Guinea Pig Serum  
18 Complement (Merck) at 37°C for 10-15 min until trophectoderm cell began to lyse. Embryos  
19 were then moved to a drop of medium and triturated with 100 µm STRIPPER tip (Cooper  
20 Surgical) to remove lysed trophectoderm cells and to isolate the inner cell mass.

21 Isolated ICMs were then briefly washed, then incubated at 37°C for 3 min in 0.5%  
22 Trypsin, 1 mM EDTA in PBS (Fisher Scientific). Then, ICMs were transferred to 4% BSA,  
23 0.5 mM EDTA in PBS for fine manual dissociation into single cells with pulled (Sutter  
24 Instruments) glass capillaries (World Precision Instruments). Cells were then picked manually  
25 with pulled glass capillaries for downstream single-cell RNA-seq.

26

## 27 **Single cell RNA-seq**

28 Single-cell cDNA synthesis was performed using SMART-Seq v4 Ultra Low Input  
29 RNA Kit for Sequencing (Takara) according to the manufacturer's protocol with some  
30 modifications as previously described<sup>17</sup>. Briefly, single-cells were manually picked after  
31 dissociation and snap frozen on dry ice in 5 µl 10x Reaction Buffer in low-bind 0.2 ml PCR  
32 tubes and stored at -80°C until processing. Samples were subject to first strand cDNA  
33 synthesis, then cDNA was amplified by LD-PCR for 23 cycles. Amplified cDNA was purified

1 on AMPure XP beads, using a 96-well magnetic stand (ThermoFisher), and eluted in 17  $\mu$ l of  
2 elution buffer. Single-cell RNA-seq libraries were prepared using a Nextera XT DNA Library  
3 Preparation Kit (Illumina) according to the manufacturer's protocol. Sequencing was carried  
4 out as paired-end 50 bp read on Novaseq 6000 to a depth of approximately 12 million reads  
5 per cell.

### 6 7 **scRNA-seq processing and analysis**

8 Single-cell RNA-seq data was pre-processed as described in Alanis-Lobato et al 2023<sup>26</sup>,  
9 [https://github.com/galanisl/early\\_hs\\_embryo\\_GRNs](https://github.com/galanisl/early_hs_embryo_GRNs). We integrated scRNA-seq data from 3  
10 different preimplantation human embryo studies profiling the three cell types present at the late  
11 blastocyst stage<sup>17-19</sup>, with the DMSO and ERKi treated samples generated in this study. High  
12 confidence lineage annotations for the cells in the previous studies were obtained from previous  
13 work<sup>25</sup>.

14 Technical replicate fastq files were merged and pre-processed using the nf-core/rnaseq  
15 pipeline 3.10.1 with Nextflow 22.10.1<sup>44</sup>. Briefly, reads were trimmed for adaptors and quality  
16 using TrimGalore 0.6.7 and cutadapt 3.4. Trimmed reads were pseudoaligned to GRCh38 with  
17 salmon 1.9.0 and used to generate estimated raw abundances and TPM normalized reads.  
18 Resulting gene expression matrices were integrated, normalized, and log2 transformed using  
19 Bioconductor tools<sup>45</sup>. Datasets were filtered to retain high-quality cells with > 20000 reads, >  
20 200 genes detected, and < 90% of reads mapping to mitochondrial genes. Mitochondrial genes  
21 and genes with an average count < 1 across all samples were removed prior to normalization.

22 To analyse lineage specification of E6-E7 cells; gene-level filtering, normalization,  
23 scaling, and log-transformation were repeated on a restricted set of cells at stages E6 and E7.  
24 Twelve marker genes representing the epiblast, primitive endoderm, and trophoblast lineages  
25 were used for PCA<sup>25</sup>. The resulting first 5 principal components were used as the input for  
26 UMAP analysis, with the number of neighbors set to 50. Clusters were detected based on the  
27 PCA output, using clusterCells<sup>46</sup> with 25 nearest neighbors.

28 Epiblast cells were selected based on the clustering output and tested for differential  
29 expression between control (DMSO treated samples from this study, and untreated samples  
30 from previous publications<sup>17-19</sup>, versus Ulixertinib treatment.

31 Differential expression between the ERKi and control samples was determine using  
32 DESeq2 with the following options: test="LRT", useT=T, minmu=1e-6,  
33 minReplicatesForReplace=ing, fitType="glmGamPoi".

1 To analyse the developmental trajectory of E4-E7 cells, per-gene variance was  
2 modelled with scran<sup>46</sup> and the top 10% most variable genes (n = 957) were used for principal  
3 component analysis (PCA).

#### 4 5 **Human primed ESC culture**

6 Primed H9 human ESC were cultured according in mTeSR1 (StemCell Technologies)  
7 according to the manufacturer's guidance, on Matrigel (356231, BD Bioscience) coated plates  
8 at 37°C 5% CO<sub>2</sub> under normoxia. H9 hESCs were and dissociated using ReLeSR (Stem Cell  
9 Technologies) incubate for 4 min at 37°C and passaged in clumps.

#### 10 11 **Human naïve ESC culture**

12 Human naïve cells were cultured in PXGL medium<sup>30</sup>: N2B27 medium (Takara, Y40002),  
13 supplemented with 1µM PD0325901 (Cambridge Bioscience; 13034-1mg-CAY), 2µM  
14 XAV939 (Cambridge bioscience, CAY13596-1mg), 2 µM Gö6983 (Bio-Techne; 2285/1),  
15 10ng/ml hLIF (PeproTech; 300-05), and Pen/Strep (Gibco), on MEF feeder layer (~1 x 10<sup>5</sup>  
16 cells / cm<sup>2</sup>) and incubated under hypoxic conditions 5%O<sub>2</sub> 5%CO<sub>2</sub> 37°C in a humid incubator.  
17 Culture medium was replaced every other day, and cells were passaged every 4-5 days with a  
18 split ratio of 1:3 – 1:5. Cells were passaged by washing with PBS, followed by incubation with  
19 Accutase (Thermo, A1110501) at 37°C for 5-10 min with gentle pipetting and monitoring to  
20 confirm single-cell dissociations. Cells were washed and pelleted, before resuspension and  
21 culture in PXGL+ROCKi medium for 24 h on a fresh MEF feeder plate. After 24 h, the medium  
22 was replaced with fresh PXGL (without ROCKi). Alternatively, the 1 µM PD0325901 above  
23 was replaced with 5 µM Ulixertinib (Cambridge Bioscience) to generate UXGL medium.

#### 24 25 **Human naïve ESC derivation**

26 Human Day 5 embryos were cultured for 36 hours in ERKi or in DMSO control medium or  
27 thawed on Day 6 and cultured for 2 hours in Global medium. Embryos that had not yet hatched  
28 had the zona pellucida removed by a brief wash in Acidic Tyrode's pre-warmed at 37°C. Whole  
29 intact embryos, or laser dissected embryos to remove mural trophectoderm, were then plated  
30 on MEF coated 4-well plates (Nunc) in pre-equilibrated PXGL or UXGL medium. PXGL or  
31 UXGL medium was made from N2B27 medium (Takara, Y40002), supplemented with either  
32 1 µM PD0325901 (Cambridge Bioscience; 13034-1mg-CAY) or 5 µM Ulixertinib (Cambridge

1 Bioscience) plus: 2  $\mu$ M XAV939 (Cambridge bioscience, CAY13596-1mg), 2  $\mu$ M Gö6983  
2 (Bio-Techne; 2285/1), 10 ng/ml hLIF (PeproTech; 300-05), and Pen/Strep (Gibco). Embryo  
3 outgrowths were left undisturbed for 48 hours at 5%O<sub>2</sub> 5%CO<sub>2</sub> 37°C, then fed with pre-  
4 equilibrated half medium changes every 2 days. After 7-10 days, outgrowths were manually  
5 picked under a dissecting microscope. Outgrowths were dissociated by washing, and then  
6 incubated in microdrops of Accutase under mineral-oil for 5 min at 37°C before trituration into  
7 single cells with 290  $\mu$ m and 100  $\mu$ m STRIPPER tips (CooperSurgical). Dissociated single  
8 cells were then washed in PXGL or UXGL medium and plated onto MEF feeder plates with  
9 PXGL or UXGL medium supplemented with ROCK inhibitor 10  $\mu$ M Y27632 (Tocris), and  
10 then re-fed with PXGL or UXGL medium every 2 days. Clones were passaged manually every  
11 5-7 days until sufficient numbers for bulk passaging, initially in a 1:1 split ratio, then 1:2 – 1:3  
12 split ratio every 3-5 days.

13

#### 14 **Bulk RNA-seq**

15 Stable naïve hESC lines were used for the bulk RNA-seq experiments. Human naïve ESCs  
16 were dissociated to single cells.  $6 \times 10^5$  cells were resuspended in 600  $\mu$ l RLT buffer (Qiagen)  
17 and snap frozen on dry ice for later processing. RNA was isolated using the RNAeasy Mini Kit  
18 (Qiagen, 74104), QIASHredder DNase digest (Qiagen, 79654), automated on a QIAcube  
19 (Qiagen) according to the manufacturer's instructions. The RNA library prep was performed  
20 using the mRNA polyA (NEB) kit, before paired-end 100 bp sequencing on a NovaSeq2 (depth  
21 of 25M reads).

22

#### 23 **hESC RNA-seq analysis**

24 Reads were assessed for quality with FastQC and trimmed with TrimGalore 0.5.0. Reads were  
25 pseudoaligned to GRCh38 using Salmon 0.11.3. Mitochondrial genes, pseudogenes, ribosomal  
26 genes, and genes not detected in any condition were removed. Samples were normalised using  
27 DESeq2 and invariant genes were removed. Any single-cells present were subject to  
28 imputation using DRImpute. Per-gene variance was modelled with scran 1.26.2 and variable  
29 genes FDR < 0.05 were used as input into principal component analysis. Similarity to an  
30 epiblast identity was assessed using DeconRNaseq<sup>47</sup>, using as a reference set high confidence  
31 epiblast cells that were obtained from previous work<sup>26</sup>.

32

## 1 **Karyotyping**

2 To determine chromosome copy number,  $2 \times 10^5$  cells from each of the hESC lines derived in  
3 this study were collected. To extract DNA the DNeasy® Blood & Tissue Kit was used  
4 according the manufacture's protocol (Qiagen, 69504 and 69506). This was followed by low-  
5 pass next generation sequencing (depth of sequencing  $< 0.1x$ ). Libraries were prepared using  
6 the VeriSeq PGS Kit (Illumina) or the NEB Ultra II FS Kit according to the manufacturer's  
7 instructions. The MiSeq platform or the Illumina HiSeq 4000 platforms were used. Reads were  
8 aligned to the human genome hg19 using BWA v0.7.17<sup>48</sup> and the copy number profiles  
9 generated with QDNaseq v1.24.0 as described previously<sup>49</sup>.

10

## 11 **Mouse embryo culture**

12 All animal research was performed in accordance with the UK Home Office regulations under  
13 project licence PP8826065, which passed ethical review by the Francis Crick Institute Animal  
14 Welfare Review Board in 2019. Three- to -four to eight-week-old (C57BL6  $\times$  CBA) F1 female  
15 mice were super-ovulated using injection of 5 IU of pregnant mare serum gonadotrophin  
16 (PMSG; Sigma-Aldrich). Forty-eight hours after PMSG injection, 5 IU of human chorionic  
17 gonadotrophin (HCG; Sigma-Aldrich) was administered. Superovulated females were set up  
18 for mating with eight-week-old or older (C57BL6  $\times$  CBA) F1 males. Mouse zygotes were  
19 isolated in FHM under mineral oil and cumulus cells were removed with hyaluronidase  
20 (Sigma-Aldrich; H4272). Mouse embryos were cultured in pre-equilibrated Global Media  
21 (Cooper Surgical) supplemented with 10% Human Serum Albumin (HSA, Cooper Surgical)  
22 overlaid with mineral oil (Cooper Surgical) at a ratio of 1 media : 9 mineral oil.

23

## 24 **Human embryo immunofluorescence staining**

25 Human embryos were washed briefly in PBS-/- + 1% HSA, followed by fixation in 4% PFA  
26 (diluted from 16% paraformaldehyde solution (Fisher Scientific) on ice for 1 h. Embryos, were  
27 then washed three times in PBS-/- + 0.1% Triton X-100 (PBX; Sigma), and permeabilized in  
28 PBS-/- + 0.5% TritonX-100 for 20 min. Embryos were washed briefly in PBX, then incubated  
29 in blocking solution: 10% Donkey serum (Jackson ImmunoResearch, 017-000-121) in PBX,  
30 for 1 hour on rotating shaker. Embryos were incubated with primary antibodies  
31 ([Supplementary Table 3](#)) diluted in blocking solution overnight at 4°C on rotating shaker. The  
32 next day, embryos were washed three time in PBX, and incubated in blocking solution for 1

1 hour on rotating shaker, before incubating with secondary antibodies diluted in blocking solution for 1 hour on rotating shaker. Finally, embryos were washed four times in PBX, and a final wash PBS/- + 0.1% Triton + 3.33% Vectashield with DAPI (Vector Laboratories, H-1200). For staining of pERK, embryos were stained as above, with the following modifications: 1 x PhosSTOP (Roche, 4906845001) was included in all solutions up to and including the primary antibody incubation, embryos were fixed in 8% PFA + 1x PhosSTOP at room temperature for 10 min on rotating shaker. Primary and secondary antibodies used in this study are outlined in [Supplementary Table 3](#).

## 10 **Bovine IVF and culture**

11 Oocytes were collected from bovine ovaries and matured overnight in BO-IVM medium (IVF Bioscience) at 38.5°C under normoxia. Frozen bull sperm straws (UK Sire Services) were thawed for 1min at 37°C, then transferred to BO-SEMENPREP (IVF Bioscience) followed by two rounds of washes and centrifugation at 300g for 5min. Granulosa cells were removed from cumulus-oocyte complexes (COCs) by pipetting and combined with  $4 \times 10^6$  spermatozoa per 1ml of BO-IVF media (IVF Bioscience) for 6-10hrs at 38.5°C under normoxia. COCs were then denuded and transferred to BO-IVC media (IVF Bioscience) overlaid with mineral oil at 20-30 presumptive embryos per 500 $\mu$ L drop followed by culture at 38.5°C under hypoxia. At 7dpf, the embryos were transferred to BO-IVC media supplemented with either 5 $\mu$ M Ulixertinib or 750ng/mL FGF4 and 1 $\mu$ g/mL heparin and cultured for an additional 48hrs.

## 22 **Immunofluorescence of bovine embryos**

23 Bovine blastocysts were fixed with 100mM HEPES pH 7, 50mM EGTA pH 7, 10mM MgSO<sub>4</sub>, 24 4% methanol-free formaldehyde and 0.2% Triton X-100 in sterile H<sub>2</sub>O for 30min at 37°C 25 followed by 3x washes with PBS with 3mg/mL polyvinylpyrrolidone (PVP). Fixed blastocysts 26 were permeabilised with 0.5% Triton X-100 in PBS with 3mg/mL PVP and blocked with 3% 27 donkey serum, 0.1% bovine serum albumin and 0.2% Triton X-100 in PBS with 3mg/mL PVP, 28 both overnight at 4°C. Primary antibodies were diluted in blocking buffer and incubated 29 overnight at 4°C and secondary antibodies were diluted 1:500 in blocking buffer and incubated 30 for 2hrs at room temperature shaking. The embryos were washed 3x for 10min following each 31 antibody incubation. DAPI was added to blocking buffer during the wash steps after secondary 32 antibody incubation for nuclear stain. Bovine blastocysts were then imaged in blocking buffer 33 without DAPI in 18-well ibidi slides using a Leica SP8 confocal microscope.



1

## 2 **Human embryo fluorescence imaging**

3 Fixed samples were imaged on a Leica SP8 scanning confocal microscope or a Zeiss LSM880.  
4 Embryos were mounted in microdroplets of PBS + 0.025% Tween20 + 1.5% Vectashield, on  
5 glass bottomed 35mm dishes (Maktek, P35G-1.5-14-C) coated with mineral oil. Embryos were  
6 imaged along the entire z-axis with a 1µm step using a glycerol immersion HC PLAN APO  
7 CS2 63x 1.30 NA objective (Leica) or a 40x or 20x objective (Zeiss). Imaging parameters were  
8 kept consistent across experiments.

9

## 10 **Human ESC immunofluorescence**

11 Primed and naïve human ESC were washed briefly in PBS, before fixation in 4% PFA at room  
12 temperature for 10 minutes. Cells were washed three times in PBS + 0.1% Triton-X (PBX)  
13 before 20 min permeabilization in 0.5% Triton X-100 on a rotating shaker. Cells were then  
14 washed, incubated in blocking solution (10% Donkey serum in PBX) for 1 hr at room  
15 temperature. Then, cells were incubated overnight in primary antibody in blocking solution at  
16 4 degrees. Cells were washed three times in PBX, before a second incubation in block solution  
17 for 1hr, followed by incubation with secondary antibodies. Antibodies outlined in  
18 [Supplementary Table 3](#).

19

## 20 **Image processing and quantification**

21 Raw images were processed in ImageJ. Nuclear segmentation for quantification of nuclear and  
22 cytoplasmic fluorescence was carried out using Stardist and CellProfiler as described  
23 previously<sup>32</sup>. Correction of segmentation errors and classification of inner ICM vs outer TE  
24 cells was performed manually. Adjustments for fluorescence decay along the z-axis was  
25 performed by linear regression followed by empirical Bayes method, as detailed in Saiz et  
26 al<sup>50,51</sup>.

27

## 28 **Acknowledgments:**

29 We thank the donors of human embryos whose contributions were essential for this research.  
30 We thank all members of the Niakan lab for their technical assistance and for help and  
31 comments on the manuscripts. We thank the Centre for Trophoblast Research for technical  
32 support and advice. We thank Florian Holfelder and Timo Kohler for support with confocal  
33 microscopy. We thank the Cambridge Stem Cell Institute for access to cell culture reagents.

1 We thank the Francis Crick Institute's Science Technology Platforms: Lyn Healy and Liani  
2 Devito from the Human Embryo and Stem Cell Unit; Advanced Sequencing Facility,  
3 Advanced Light Microscopy and the Genomics Equipment Park. Work in the laboratory of  
4 KKN was supported by the Wellcome 221856/Z/20/Z (KKN). Work in the laboratories of  
5 KKN and MH was supported by the Wellcome Human Developmental Biology Initiative  
6 215116/Z/18/Z. Work in the laboratory of KKN was also supported by the Francis Crick  
7 Institute which receives its core funding from Cancer Research UK FC001120, the Medical  
8 Research Council FC001120 and Wellcome FC001120. For the purpose of Open Access, the  
9 authors have applied a CC BY public copyright licence to any Author Accepted Manuscript  
10 version arising from this submission.

11

### 12 **Author contributions:**

13 Conceptualization: CSS; Methodology: CSS, AM, KKN; Investigation: CSS, AM, AF, KKN,  
14 DS, QH; Visualisation: CSS, KKN; Analysis: CSS, LW, AF; Funding acquisition: KKN, MH;  
15 Project administration: CSS, KKN; Supervision: CSS, KKN; Human embryo consenting and  
16 facilitating donations: TP, KE, PS, LC, SA, VS, MT, MH, MC; Writing – original draft: CSS,  
17 KKN; Writing – review & editing: CSS, KKN with support from all authors.

18

19 **Competing interests:** Authors declare that they have no competing interests.

20

21 **Data and materials availability:** Raw data produced for this study has been uploaded onto  
22 GEO accession GSE250614:

23 <https://www.ncbi.nlm.nih.gov/geo/query/acc.cgi?acc=GSE250614>

24 A reviewer token is needed for access. Details of the analysis methods and code are available  
25 at: [https://gitlab.developers.cam.ac.uk/ctr/ctr-bioinformatics/niakan-lab/kkn21\\_cs564\\_001](https://gitlab.developers.cam.ac.uk/ctr/ctr-bioinformatics/niakan-lab/kkn21_cs564_001).

26 Single-cell RNA-seq data from E4-E7 embryos were downloaded from GEO accessions  
27 GSE66507 and GSE36552, and ArrayExpress <https://www.ebi.ac.uk/biostudies/arrayexpress/>  
28 accession E-MTAB-3929. Primed and naive hESC datasets were downloaded from the ENA  
29 Browser <https://www.ebi.ac.uk/ena/browser/home> accessions PRJEB7132, PRJNA286204,  
30 PRJNA522065, PRJNA575370, PRJEB12748, and PRJEB47485. All reagents, codes and  
31 materials used will be available to any researcher for the purposes of reproducing or  
32 extending the analysis.

## 1 **References**

- 2 1. Macklon, N. S., Geraedts, J. P. M. & Fauser, B. C. J. M. Conception to ongoing pregnancy: the “black  
3 box” of early pregnancy loss. *Hum. Reprod. Update* **8**, 333–343 (2002).
- 4 2. Yamanaka, Y., Lanner, F. & Rossant, J. FGF signal-dependent segregation of primitive endoderm and  
5 epiblast in the mouse blastocyst. *Development* **137**, 715–724 (2010).
- 6 3. Kuijk, E. W. *et al.* The roles of FGF and MAP kinase signaling in the segregation of the epiblast and  
7 hypoblast cell lineages in bovine and human embryos. *Development* **139**, 871–882 (2012).
- 8 4. Rodríguez, A., Allegrucci, C. & Alberio, R. Modulation of pluripotency in the porcine embryo and iPS  
9 cells. *PLoS One* **7**, e49079 (2012).
- 10 5. Piliszek, A., Madeja, Z. E. & Plusa, B. Suppression of ERK signalling abolishes primitive endoderm  
11 formation but does not promote pluripotency in rabbit embryo. *Development* **144**, 3719–3730 (2017).
- 12 6. Frankenberg, S. *et al.* Primitive endoderm differentiates via a three-step mechanism involving Nanog and  
13 RTK signaling. *Dev. Cell* **21**, 1005–1013 (2011).
- 14 7. Kang, M., Garg, V. & Hadjantonakis, A.-K. Lineage establishment and progression within the inner cell  
15 mass of the mouse blastocyst requires FGFR1 and FGFR2. *Dev. Cell* **41**, 496–510.e5 (2017).
- 16 8. Molotkov, A., Mazot, P., Brewer, J. R., Cinalli, R. M. & Soriano, P. Distinct requirements for FGFR1 and  
17 FGFR2 in primitive endoderm development and exit from pluripotency. *Dev. Cell* **41**, 511–526.e4 (2017).
- 18 9. Chazaud, C., Yamanaka, Y., Pawson, T. & Rossant, J. Early lineage segregation between epiblast and  
19 primitive endoderm in mouse blastocysts through the Grb2-MAPK pathway. *Dev. Cell* **10**, 615–624  
20 (2006).
- 21 10. Kang, M., Piliszek, A., Artus, J. & Hadjantonakis, A.-K. FGF4 is required for lineage restriction and salt-  
22 and-pepper distribution of primitive endoderm factors but not their initial expression in the mouse.  
23 *Development* **140**, 267–279 (2013).
- 24 11. Krawchuk, D., Honma-Yamanaka, N., Anani, S. & Yamanaka, Y. FGF4 is a limiting factor controlling the  
25 proportions of primitive endoderm and epiblast in the ICM of the mouse blastocyst. *Dev. Biol.* **384**, 65–71  
26 (2013).
- 27 12. Nichols, J., Silva, J., Roode, M. & Smith, A. Suppression of Erk signalling promotes ground state  
28 pluripotency in the mouse embryo. *Development* **136**, 3215–3222 (2009).
- 29 13. Ying, Q.-L. *et al.* The ground state of embryonic stem cell self-renewal. *Nature* **453**, 519–523 (2008).
- 30 14. Roode, M. *et al.* Human hypoblast formation is not dependent on FGF signalling. *Dev. Biol.* **361**, 358–363  
31 (2012).

- 1 15. Wamaitha, S. E. *et al.* IGF1-mediated human embryonic stem cell self-renewal recapitulates the embryonic  
2 niche. *Nat. Commun.* **11**, 764 (2020).
- 3 16. Linneberg-Agerholm, M. *et al.* Naïve human pluripotent stem cells respond to Wnt, Nodal, and LIF  
4 signalling to produce expandable naïve extra-embryonic endoderm. *Development* **146**, dev180620 (2019).
- 5 17. Blakeley, P. *et al.* Defining the three cell lineages of the human blastocyst by single-cell RNA-seq.  
6 *Development* **142**, 3151–3165 (2015).
- 7 18. Yan, L. *et al.* Single-cell RNA-Seq profiling of human preimplantation embryos and embryonic stem cells.  
8 *Nat. Struct. Mol. Biol.* **20**, 1131–1139 (2013).
- 9 19. Petropoulos, S. *et al.* Single-cell RNA-seq reveals lineage and X chromosome dynamics in human  
10 preimplantation embryos. *Cell* **167**, 285 (2016).
- 11 20. Brewer, J. R., Mazot, P. & Soriano, P. Genetic insights into the mechanisms of Fgf signaling. *Genes Dev.*  
12 **30**, 751–771 (2016).
- 13 21. Azami, T. *et al.* Regulation of the ERK signalling pathway in the developing mouse blastocyst.  
14 *Development* **146**, dev177139 (2019).
- 15 22. Simon, C. S., Rahman, S., Raina, D., Schröter, C. & Hadjantonakis, A.-K. Live visualization of ERK  
16 activity in the mouse blastocyst reveals lineage-specific signaling dynamics. *Dev. Cell* **55**, 341-353.e5  
17 (2020).
- 18 23. Germann, U. A. *et al.* Targeting the MAPK signaling pathway in cancer: Promising preclinical activity  
19 with the novel selective ERK1/2 inhibitor BVD-523 (ulixertinib). *Mol. Cancer Ther.* **16**, 2351–2363  
20 (2017).
- 21 24. Pokrass, M. J. *et al.* Cell-cycle-dependent ERK signaling dynamics direct fate specification in the  
22 mammalian preimplantation embryo. *Dev. Cell* **55**, 328-340.e5 (2020).
- 23 25. Stirparo, G. G. *et al.* Integrated analysis of single-cell embryo data yields a unified transcriptome signature  
24 for the human pre-implantation epiblast. *Development* **145**, dev158501 (2018).
- 25 26. Alanis-Lobato, G. *et al.* MICA: a multi-omics method to predict gene regulatory networks in early human  
26 embryos. *Life Sci. Alliance* **7**, (2024).
- 27 27. Strawbridge, S. E., Clarke, J., Guo, G. & Nichols, J. Deriving human naïve embryonic stem cell lines from  
28 donated supernumerary embryos using physical distancing and signal inhibition. *Methods Mol. Biol.* **2416**,  
29 1–12 (2022).
- 30 28. Guo, G. *et al.* Naive pluripotent stem cells derived directly from isolated cells of the human inner cell  
31 mass. *Stem Cell Reports* **6**, 437–446 (2016).

- 1 29. Takashima, Y. *et al.* Resetting transcription factor control circuitry toward ground-state pluripotency in  
2 human. *Cell* **162**, 452–453 (2015).
- 3 30. Bredenkamp, N. *et al.* Wnt inhibition facilitates RNA-mediated reprogramming of human somatic cells to  
4 naive pluripotency. *Stem Cell Reports* **13**, 1083–1098 (2019).
- 5 31. Bredenkamp, N., Stirparo, G. G., Nichols, J., Smith, A. & Guo, G. The cell-surface marker Sushi  
6 Containing Domain 2 facilitates establishment of human naive pluripotent stem cells. *Stem Cell Reports*  
7 **12**, 1212–1222 (2019).
- 8 32. Lea, R. A. *et al.* KLF17 promotes human naïve pluripotency but is not required for its establishment.  
9 *Development* **148**, (2021).
- 10 33. Pastor, W. A. *et al.* TFAP2C regulates transcription in human naive pluripotency by opening enhancers.  
11 *Nat. Cell Biol.* **20**, 553–564 (2018).
- 12 34. Pontis, J. *et al.* Hominoid-specific transposable elements and KZFPs facilitate human embryonic genome  
13 activation and control transcription in naive human ESCs. *Cell Stem Cell* **24**, 724–735.e5 (2019).
- 14 35. Allègre, N. *et al.* NANOG initiates epiblast fate through the coordination of pluripotency genes expression.  
15 *Nat. Commun.* **13**, 3550 (2022).
- 16 36. Boroviak, T. *et al.* Lineage-specific profiling delineates the emergence and progression of naive  
17 pluripotency in mammalian embryogenesis. *Dev. Cell* **35**, 366–382 (2015).
- 18 37. Labrosse, G. R. *et al.* Oocyte and embryo culture under oil profoundly alters effective concentrations of  
19 small molecule inhibitors. *bioRxiv* (2023) doi:10.1101/2023.11.10.566607.
- 20 38. Dattani, A. *et al.* Human naïve stem cell models reveal the role of FGF in hypoblast specification in the  
21 human embryo. *bioRxiv* 2023.11.30.569161 (2023) doi:10.1101/2023.11.30.569161.
- 22 39. Gerri, C. *et al.* A conserved role of the Hippo signalling pathway in initiation of the first lineage  
23 specification event across mammals. *Development* **150**, (2023).
- 24 40. Gerri, C. *et al.* Initiation of a conserved trophectoderm program in human, cow and mouse embryos.  
25 *Nature* **587**, 443–447 (2020).
- 26 41. Corujo-Simon, E., Radley, A. H. & Nichols, J. Evidence implicating sequential commitment of the founder  
27 lineages in the human blastocyst by order of hypoblast gene activation. *Development* **150**, (2023).
- 28 42. Radley, A., Corujo-Simon, E., Nichols, J., Smith, A. & Dunn, S.-J. Entropy sorting of single-cell RNA  
29 sequencing data reveals the inner cell mass in the human pre-implantation embryo. *Stem Cell Reports* **18**,  
30 47–63 (2023).

- 1 43. Solter, D. & Knowles, B. B. Immunosurgery of mouse blastocyst. *Proc. Natl. Acad. Sci. U. S. A.* **72**, 5099–  
2 5102 (1975).
- 3 44. Ewels, P. A. *et al.* The nf-core framework for community-curated bioinformatics pipelines. *Nat.*  
4 *Biotechnol.* **38**, 276–278 (2020).
- 5 45. Amezcua, R. A. *et al.* Orchestrating single-cell analysis with Bioconductor. *Nat. Methods* **17**, 137–145  
6 (2020).
- 7 46. Lun, A. T. L., Bach, K. & Marioni, J. C. Pooling across cells to normalize single-cell RNA sequencing data  
8 with many zero counts. *Genome Biol.* **17**, 75 (2016).
- 9 47. Gong, T. & Szustakowski, J. D. DeconRNASeq: a statistical framework for deconvolution of  
10 heterogeneous tissue samples based on mRNA-Seq data. *Bioinformatics* **29**, 1083–1085 (2013).
- 11 48. Li, H. & Durbin, R. Fast and accurate long-read alignment with Burrows-Wheeler transform.  
12 *Bioinformatics* **26**, 589–595 (2010).
- 13 49. Scheinin, I. *et al.* DNA copy number analysis of fresh and formalin-fixed specimens by shallow whole-  
14 genome sequencing with identification and exclusion of problematic regions in the genome assembly.  
15 *Genome Res.* **24**, 2022–2032 (2014).
- 16 50. Saiz, N., Kang, M., Schrode, N., Lou, X. & Hadjantonakis, A.-K. Quantitative analysis of protein  
17 expression to study lineage specification in mouse preimplantation embryos. *J. Vis. Exp.* (2016)  
18 doi:10.3791/53654-v.
- 19 51. Saiz, N., Williams, K. M., Seshan, V. E. & Hadjantonakis, A.-K. Asynchronous fate decisions by single  
20 cells collectively ensure consistent lineage composition in the mouse blastocyst. *Nat. Commun.* **7**, 13463  
21 (2016).
